# Supplementary material for: A universal strategy for the facile synthesis of a sandwich-structured Pt–graphene–Pt nanocomposite for salbutamol sensing
Source: Royal Society of Chemistry journal article supplement (doi:10.1039/c5nj02278a), 2015-10-27
Supplement: c5nj02278a1.pdf [file c5nj02278a1.pdf]

Electronic Supplementary Material (ESI) for New Journal of Chemistry

## Electronic Supplementary Information

### A universal strategy for the facile synthesis of sandwich-structured Pt-graphene-Pt nanocomposite for Salbutamol sensing

Xiaofei Zhu <sup>a,b,†</sup>, Xuemin Duan <sup>a,†</sup>, Jingkun Xu <sup>a,\*</sup>, Limin Lu <sup>b,\*</sup>, Kaixin Zhang <sup>c</sup>,  
Huakun Xing <sup>a</sup>, Yansha Gao <sup>a</sup>, Taotao Yang <sup>a</sup>, Wenmin Wang <sup>b</sup>

<sup>a</sup>School of Pharmacy, Jiangxi Science and Technology Normal University, Nanchang 330013, PR China.

<sup>b</sup>College of Science, Jiangxi Agricultural University, Nanchang 330045, PR China.

<sup>c</sup>Centre for Nanoscale BioPhotonics, Macquarie University, North Ryde, 2109, NSW, Australia.

<sup>†</sup>These authors contributed equally to this work and should be considered co-first authors.

\*Corresponding author. E-mail: [xujingkun@tsinghua.org.cn](mailto:xujingkun@tsinghua.org.cn) (J.-K.Xu), [lulimin816@hotmail.com](mailto:lulimin816@hotmail.com) (L.-M. Lu)

Tel.: +86 791 8537967; Fax: +86 791 3823320

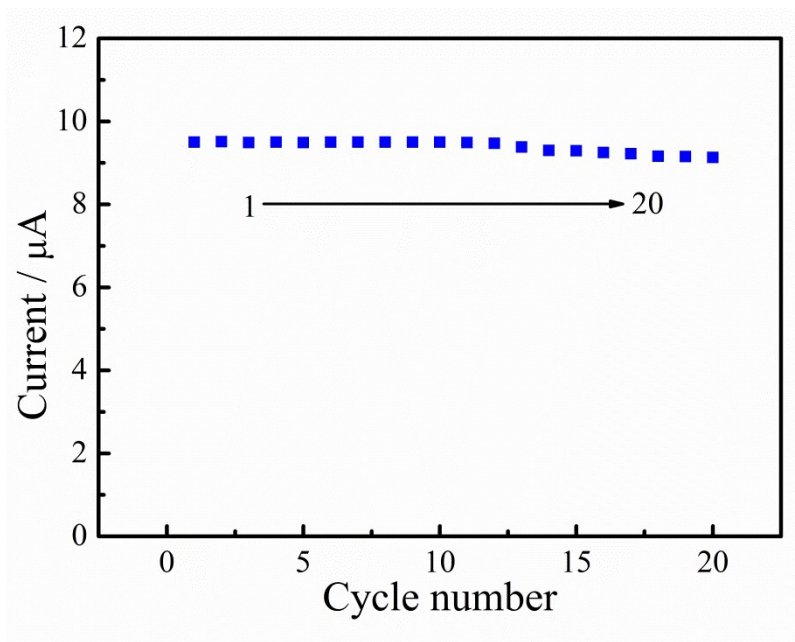

**Fig. S1** Current response at P-Gr-P/GCE towards 20  $\mu\text{M}$  SAL after performing different cyclic voltammetry cycles. Other conditions

were the same as Fig. 3.

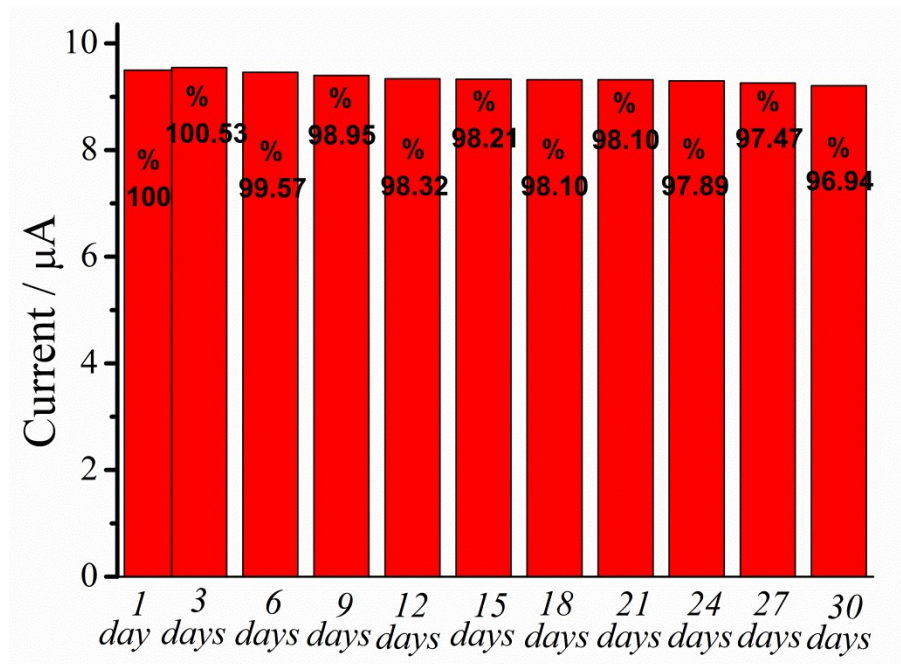

**Fig. S2** Detection of  $20 \mu\text{M}$  SAL at one P-Gr-P modified electrode after certain days. Other conditions were the same as Fig. 3.
